# Supplementary material for: High Mortality and Graft Loss after Infective Endocarditis in Kidney Transplant Recipients: A Case-Controlled Study from Two Centers
Source: MDPI journal article supplement (doi:10.3390/pathogens10081023), 2021-08-13
Supplement: s1 [file s1]

## Supplementary tables

**Supplementary Table S1.** Characteristics of the patients who suffered an IE complicated by vascular embolism.

| Characteristics                          | N = 6, n (%), or Mean $\pm$ SD |
|------------------------------------------|--------------------------------|
| <b>Valve</b>                             |                                |
| Native                                   | 6 (100)                        |
| Aortic IE                                | 3 (50)                         |
| Mitral IE                                | 3 (50)                         |
| Ring abscess and/or severe valve leakage | 3 (50)                         |
| <b>Microbiology</b>                      |                                |
| <i>Enterococci</i>                       | 2 (33.3)                       |
| <i>Staphylococcus aureus</i>             | 2 (33.3)                       |
| <i>Streptococcus gallolyticus</i>        | 1 (16.7)                       |
| <i>Escherichia coli</i>                  | 1 (16.7)                       |
| <b>Treatment</b>                         |                                |
| Antibiotic treatment duration (weeks)    | 6.0 $\pm$ 3.5                  |
| Aminoglycoside use                       | 6 (100)                        |
| Indication for surgery                   | 5 (83.3)                       |
| Surgery                                  | 1 (16.7)                       |
| One year mortality                       | 3 (50)                         |

IE: infective endocarditis.

**Supplementary Table S2.** Characteristics of the cases of IE complicated by death or graft loss (without death over the study period).

| Characteristics                          | IE Complicated by Death<br>N = 8<br>n (%) or Mean $\pm$ SD | IE Complicated by Graft Loss and Not Death<br>N = 5<br>n (%) or Mean $\pm$ SD |
|------------------------------------------|------------------------------------------------------------|-------------------------------------------------------------------------------|
| <b>Valve</b>                             |                                                            |                                                                               |
| Native                                   | 8 (87.5)                                                   | 3 (60)                                                                        |
| Prosthetic                               | 1 (12.5)                                                   | 2 (40)                                                                        |
| Aortic IE                                | 4 (50)                                                     | 2 (40)                                                                        |
| Mitral IE                                | 4 (50)                                                     | 1 (20)                                                                        |
| Mitral and aortic IE                     | 0 (0)                                                      | 2 (40)                                                                        |
| Ring abscess and/or severe valve leakage | 4 (50)                                                     | 1 (20)                                                                        |
| <b>Microbiology</b>                      |                                                            |                                                                               |
| <i>Enterococci</i>                       | 4 (50)                                                     | 2 (40)                                                                        |
| <i>Staphylococcus aureus</i>             | 3 (37.5)                                                   | 0 (0)                                                                         |
| <i>Escherichia coli</i>                  | 1 (10)                                                     | 0 (0)                                                                         |
| <i>Staphylococcus epidermidis</i>        | 0 (0)                                                      | 2 (40)                                                                        |
| No documentation                         | 0 (0)                                                      | 1 (20)                                                                        |
| <b>Treatment</b>                         |                                                            |                                                                               |
| Antibiotic treatment duration (weeks)    | NA *                                                       | 6 $\pm$ 0                                                                     |
| Aminoglycoside use                       | 7 (87.5)                                                   | 2 (40)                                                                        |
| Indication for surgery                   | 6 (75)                                                     | 1 (20)                                                                        |
| Surgery                                  | 1 (12.5)                                                   | 0 (0)                                                                         |

\* Not Applicable due to early death.
